# Supplementary material for: Evaluation of sted super-resolution image quality by image correlation spectroscopy (QuICS)
Source: PubMed Central journal article supplement (PMC8531054; doi:10.1038/s41598-021-00301-x), 2021-10-21
Supplement: 41598_2021_301_MOESM1_ESM.pdf [file 41598_2021_301_MOESM1_ESM.pdf]

## Supplementary Information of

### Evaluation ofsted super-resolution image quality by image correlation spectroscopy (QuICS)

Elena Cerutti<sup>1,2</sup>, Morgana D'Amico<sup>1</sup>, Isotta Cainero<sup>2</sup>, Gaetano Ivan Dellino<sup>3,4</sup>, Mario Faretta<sup>3</sup>, Giuseppe Vicidomini<sup>5</sup>, Pier Giuseppe Pelicci<sup>3,4</sup>, Paolo Bianchini<sup>2</sup>, Alberto Diaspro<sup>2,6</sup>, Luca Lanzanò<sup>1,2,\*</sup>

<sup>1</sup>Department of Physics and Astronomy "Ettore Majorana", University of Catania, Via S. Sofia 64, 95123 Catania, Italy

<sup>2</sup>Nanoscopy and NIC@IIT, CHT Erzelli, Istituto Italiano di Tecnologia, Via Enrico Melen 83, Building B, 16152 Genoa, Italy

<sup>3</sup>Department of Experimental Oncology, IEO, European Institute of Oncology IRCCS, 20100 Milan, Italy

<sup>4</sup>Department of Oncology and Hemato-Oncology, University of Milan, 20100 Milan, Italy

<sup>5</sup>Molecular Microscopy and Spectroscopy, CHT Erzelli, Istituto Italiano di Tecnologia, Via Enrico Melen 83, Building B, 16152 Genoa, Italy

<sup>6</sup>DIFILAB, Department of Physics, University of Genoa, via Dodecaneso 33, 16143 Genoa, Italy

\*Corresponding author: [luca.lanzano@unict.it](mailto:luca.lanzano@unict.it)

**a**

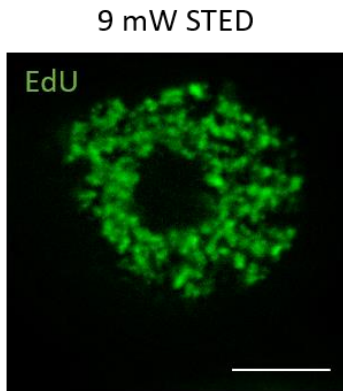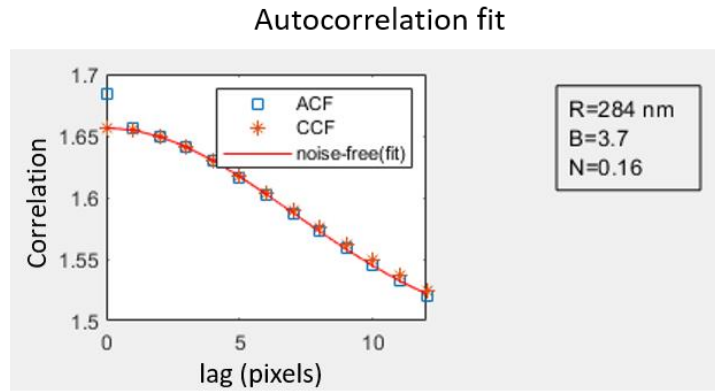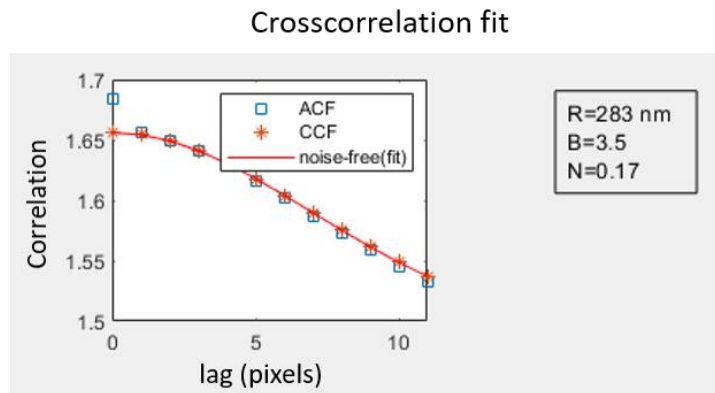

**b**

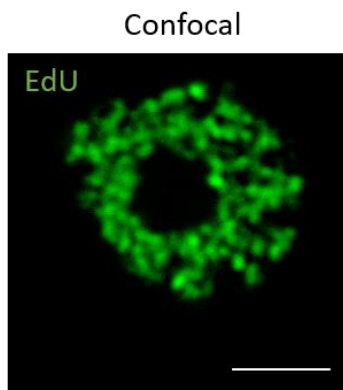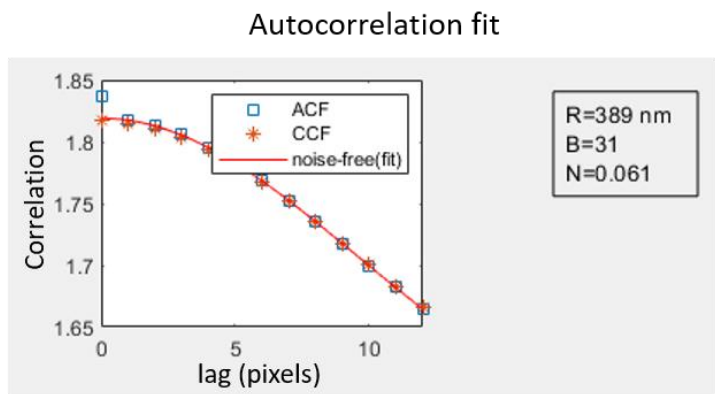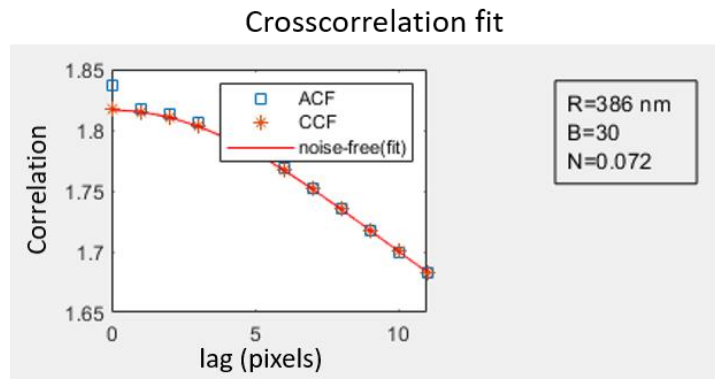

### Supplementary Figure 1. Noise-free correlation function extraction

Shown is an example of data obtained with the QuICS algorithm from the same cell. **a** (left) STED image of U937-PR9 cell upon staining of DNA replication foci (STED depletion power 9 mW). (right top row) Fit of the autocorrelation function, excluding the zero lag point, and the relative extracted parameters: R, B, N. (right bottom row) Fit of the crosscorrelation function between two statistically independent images obtained through chessboard downsampling, and the relative extracted parameters. **b** Confocal image of the same U937-PR9 cell and QuICS analysis of the auto and crosscorrelation fits. Scale bars represent 3  $\mu\text{m}$ .
